# Supplementary material for: Non-Malignant Respiratory Illnesses in Association with Occupational Exposure to Asbestos and Other Insulating Materials: Findings from the Alberta Insulator Cohort
Source: MDPI journal article supplement (doi:10.3390/ijerph17197085), 2020-09-28
Supplement: s1 [file s1]

## **Non-malignant Respiratory Illnesses in Association with Occupational Exposure to Asbestos and Other Insulating Materials: Findings from the Alberta Insulator Cohort**

Subhabrata Moitra, Ali Farshchi Tabrizi, Kawtar Idrissi Machichi, Samineh Kamravaei, Noushin Miandashti, Linda Henderson, Manali Mukherjee, Fadi Khadour, Muhammad T. Naseem, Paige Lacy, Lyle Melenka

### **List of supplementary Tables:**

**Supplementary Table S1:** Association between different occupational exposures at work and frequency of chest infections in the last 3 years in insulators.

**Supplementary Table S2:** Association between different occupational exposures at work and chest infection in insulators.

**Supplementary Table S3:** Association between different occupational exposures at work and COPD in insulators.

**Supplementary Table S4:** Association between different occupational exposures at work and asthma in insulators.

**Supplementary Table S5:** Association between different occupational exposures at work (multi-exposure models) and respiratory conditions in insulators.

**Supplementary Table S6:** Effect modification by smoking on the association between different occupational exposures at work and respiratory conditions in insulators.

**Supplementary Table S7:** Effect modification by exposure to smoke at childhood on the association between different occupational exposures at work and respiratory conditions in insulators.

**Supplementary Table S8:** Effect modification by parental lung disease on the association between different occupational exposures at work and respiratory conditions in insulators.

**Supplementary Table S9:** Effect modification by family history of cancer on the association between different occupational exposures at work and respiratory conditions in insulators.

**Supplementary Table S10:** Effect modification by any allergies on the association between different occupational exposures at work and respiratory conditions.

**Supplementary Table S1:** Association between different occupational exposures at work and frequency of chest infections in the past 3 years in insulators.

| Exposures                 | Frequency of chest infection |                          |
|---------------------------|------------------------------|--------------------------|
|                           | $\beta$ (95%CI)              |                          |
|                           | Unadjusted                   | Adjusted                 |
| Asbestos                  | <b>0.35 (0.14, 0.56)</b>     | <b>0.50 (0.26, 0.73)</b> |
| Aerogels                  | -0.03 (-0.25, 0.18)          | -0.02 (-0.23, 0.19)      |
| Calcium silicate          | <b>0.68 (0.32, 1.04)</b>     | <b>0.73 (0.37, 1.09)</b> |
| Carbon fibers             | <b>0.31 (0.09, 0.52)</b>     | <b>0.30 (0.09, 0.51)</b> |
| Fiberglass                | <b>0.59 (0.28, 0.91)</b>     | <b>0.59 (0.27, 0.91)</b> |
| Mineral fibers            | <b>0.85 (0.23, 1.46)</b>     | <b>0.73 (0.13, 1.34)</b> |
| Refractory ceramic fibers | <b>0.68 (0.46, 0.90)</b>     | <b>0.64 (0.43, 0.86)</b> |

Data shown as regression coefficient ( $\beta$ ) and 95% confidence interval (95%CI) obtained from negative binomial regression models taking frequencies of chest infections in the past 3 years as a count variable. In adjusted modes, sex, age, education (3 categories: up to high school, trade school and college or beyond), and smoking pack-years were considered as confounders. Each row is a single exposure model.

**Supplementary Table S2:** Association between different occupational exposures at work and chest infection in insulators.

| Exposures                 | Chest infection          |                          |                          |
|---------------------------|--------------------------|--------------------------|--------------------------|
|                           | PR (95%CI)               |                          |                          |
|                           | Model-1                  | Model-2                  | Model-3                  |
| Asbestos                  | <b>1.29 (1.12, 1.49)</b> | <b>1.30 (1.12, 1.51)</b> | <b>1.42 (1.18, 1.72)</b> |
| Aerogels                  | 1.11 (0.97, 1.27)        | 1.12 (0.98, 1.28)        | 0.89 (0.63, 1.26)        |
| Calcium silicate          | <b>1.41 (1.08, 1.84)</b> | <b>1.42 (1.08, 1.86)</b> | NA                       |
| Carbon fibers             | <b>1.19 (1.03, 1.37)</b> | <b>1.18 (1.02, 1.36)</b> | NA                       |
| Fiberglass                | <b>1.32 (1.05, 1.67)</b> | <b>1.27 (1.01, 1.61)</b> | 1.28 (1.00, 1.64)        |
| Mineral fibers            | 1.56 (0.97, 2.52)        | 1.51 (0.93, 2.45)        | 1.47 (0.89, 2.43)        |
| Refractory ceramic fibers | <b>1.38 (1.18, 1.61)</b> | <b>1.34 (1.15, 1.57)</b> | NA                       |

Data shown as prevalence ratio (PR) and 95% confidence interval (95%CI) obtained from modified Poisson regression models. Model-1: unadjusted models; Model-2: adjusted for sex, age, education (3 categories: up to high school, trade school and college or beyond), and smoking pack-years. Model-3: Model-2 + additional adjustment for personal protective equipments (PPE) for each of the exposures. Each row is a single exposure model. NA: PPE information not available for those exposures.

**Supplementary Table S3:** Association between different occupational exposures at work and COPD in insulators.

| Exposures                 | COPD                     |                          |                          |
|---------------------------|--------------------------|--------------------------|--------------------------|
|                           | PR (95%CI)               |                          |                          |
|                           | Model-1                  | Model-2                  | Model-3                  |
| Asbestos                  | <b>2.70 (1.90, 3.83)</b> | <b>1.44 (1.01, 2.05)</b> | <b>1.52 (1.03, 2.24)</b> |
| Aerogels                  | 0.85 (0.63, 1.16)        | 1.04 (0.78, 1.39)        | 1.10 (0.67, 1.81)        |
| Calcium silicate          | 0.70 (0.48, 1.04)        | <b>0.57 (0.41, 0.80)</b> | NA                       |
| Carbon fibers             | 1.28 (0.94, 1.74)        | 1.11 (0.83, 1.49)        | NA                       |
| Fiberglass                | 1.45 (0.89, 2.36)        | 0.83 (0.51, 1.33)        | 0.89 (0.54, 1.47)        |
| Mineral fibers            | 0.90 (0.45, 1.79)        | 0.76 (0.42, 1.38)        | 0.82 (0.43, 1.55)        |
| Refractory ceramic fibers | 1.20 (0.88, 1.63)        | 0.95 (0.71, 1.29)        | NA                       |

Data shown as prevalence ratio (PR) and 95% confidence interval (95%CI) obtained from modified Poisson regression models. Model-1: unadjusted models; Model-2: adjusted for sex, age, education (3 categories: up to high school, trade school and college or beyond), and smoking pack-years. Model-3: Model-2 + additional adjustment for personal protective equipments (PPE) for each of the exposures. Each row is a single exposure model. NA: PPE information not available for those exposures.

**Supplementary Table S4:** Association between different occupational exposures at work and asthma in insulators.

| Exposures                 | Asthma            |                   |                          |
|---------------------------|-------------------|-------------------|--------------------------|
|                           | PR (95%CI)        |                   |                          |
|                           | Model-1           | Model-2           | Model-3                  |
| Asbestos                  | 0.99 (0.54, 1.82) | 1.31 (0.65, 2.63) | 1.36 (0.97, 1.90)        |
| Aerogels                  | 1.13 (0.61, 2.08) | 1.11 (0.59, 2.09) | 1.16 (0.28, 4.78)        |
| Calcium silicate          | 2.43 (0.59, 9.93) | 2.59 (0.62, 9.98) | NA                       |
| Carbon fibers             | 1.10 (0.59, 2.06) | 1.15 (0.61, 2.20) | NA                       |
| Fiberglass                | 0.78 (0.35, 1.74) | 0.93 (0.41, 2.11) | 0.77 (0.29, 2.06)        |
| Mineral fibers            | 0.38 (0.14, 1.01) | 0.41 (0.15, 1.10) | <b>0.26 (0.07, 0.93)</b> |
| Refractory ceramic fibers | 0.62 (0.34, 1.15) | 0.67 (0.36, 1.25) | NA                       |

Data shown as prevalence ratio (PR) and 95% confidence interval (95%CI) obtained from modified Poisson regression models. Model-1: unadjusted models; Model-2: adjusted for sex, age, education (3 categories: up to high school, trade school and college or beyond), and smoking pack-years. Model-3: Model-2 + additional adjustment for personal protective equipments (PPE) for each of the exposures. Each row is a single exposure model. NA: PPE information not available for those exposures.

**Supplementary Table S5:** Association between different occupational exposures at work (multiexposure models) and respiratory conditions in insulators.

| Exposures                 | Chest infection          |                          | COPD                     |                          | Asthma                   |                          |
|---------------------------|--------------------------|--------------------------|--------------------------|--------------------------|--------------------------|--------------------------|
|                           | PR (95%CI)               |                          | PR (95%CI)               |                          | PR (95%CI)               |                          |
|                           | Model-1                  | Model-2                  | Model-1                  | Model-2                  | Model-1                  | Model-2                  |
| Asbestos                  | <b>1.19 (1.03, 1.38)</b> | <b>1.21 (1.04, 1.42)</b> | <b>2.79 (1.94, 4.05)</b> | <b>1.55 (1.08, 2.22)</b> | 1.05 (0.54, 2.05)        | <b>1.36 (0.64, 2.87)</b> |
| Aerogels                  | 1.07 (0.94, 1.23)        | 1.08 (0.94, 1.23)        | 0.83 (0.62, 1.13)        | 1.05 (0.79, 1.39)        | 1.13 (0.62, 2.08)        | 1.09 (0.57, 2.06)        |
| Calcium silicate          | 1.11 (0.83, 1.48)        | 1.15 (0.86, 1.55)        | <b>0.49 (0.32, 0.76)</b> | <b>0.48 (0.32, 0.72)</b> | 5.19 (0.90, 30.0)        | 5.04 (0.86, 29.6)        |
| Carbon fibers             | 1.07 (0.92, 1.23)        | 1.07 (0.92, 1.24)        | 1.23 (0.89, 1.68)        | 1.21 (0.90, 1.62)        | 1.22 (0.62, 2.37)        | 1.20 (0.62, 2.34)        |
| Fiberglass                | 1.09 (0.85, 1.40)        | 1.08 (0.84, 1.38)        | 1.10 (0.66, 1.83)        | 0.82 (0.49, 1.37)        | 0.93 (0.36, 2.40)        | 1.04 (0.41, 2.63)        |
| Mineral fibers            | 1.17 (0.71, 1.92)        | 1.11 (0.67, 1.83)        | 0.88 (0.43, 1.80)        | 1.06 (0.52, 2.16)        | <b>0.22 (0.06, 0.83)</b> | <b>0.22 (0.06, 0.80)</b> |
| Refractory ceramic fibers | <b>1.25 (1.06, 1.47)</b> | <b>1.22 (1.03, 1.44)</b> | 1.15 (0.82, 1.63)        | 1.09 (0.78, 1.53)        | 0.54 (0.29, 1.02)        | 0.56 (0.30, 1.04)        |

Data shown as prevalence ratio (PR) and 95% confidence interval (95%CI) obtained from modified Poisson regression models. Model-1: multiexposure (all exposures) models without adjustment for confounders. Model-2: multiexposure (all exposures) models adjusted for sex, age, education (3 categories: up to high school, trade school and college or beyond), and smoking pack-years.

**Supplementary Table S6:** Effect modification by smoking on the association between different occupational exposures at work and respiratory conditions in insulators.

| Exposures                 | Smoking history          |                          |           | Smoking history   |                          |           | Smoking history   |                   |           |
|---------------------------|--------------------------|--------------------------|-----------|-------------------|--------------------------|-----------|-------------------|-------------------|-----------|
|                           | NS (N=332)               |                          | S (N=658) | NS (N=332)        |                          | S (N=658) | NS (N=332)        |                   | S (N=658) |
|                           | Chest infection          |                          |           | COPD              |                          |           | Asthma            |                   |           |
|                           | PR (95%CI)               | PR (95%CI)               | #p        | PR (95%CI)        | PR (95%CI)               | #p        | PR (95%CI)        | PR (95%CI)        | #p        |
| Asbestos                  | <b>1.57 (1.18, 2.11)</b> | <b>1.19 (1.00, 1.43)</b> | 0.08      | 2.02 (0.82, 4.96) | 1.35 (0.93, 1.96)        | 0.17      | 0.59 (0.18, 1.92) | 2.03 (0.76, 5.44) | 0.13      |
| Aerogels                  | 0.98 (0.68, 1.41)        | 0.98 (0.76, 1.26)        | 0.94      | 1.83 (0.80, 4.19) | 0.93 (0.68, 1.26)        | 0.37      | 0.39 (0.11, 1.35) | 1.77 (0.81, 3.85) | 0.06      |
| Calcium silicate          | 1.18 (0.70, 1.96)        | <b>1.55 (1.13, 2.13)</b> | 0.45      | 0.44 (0.17, 1.15) | <b>0.68 (0.46, 0.99)</b> | 0.21      | NE                | 1.82 (0.44, 7.61) | NE        |
| Carbon fibers             | 0.97 (0.74, 1.28)        | <b>1.28 (1.09, 1.52)</b> | 0.12      | 1.06 (0.47, 2.41) | 1.15 (0.85, 1.56)        | 0.81      | 1.45 (0.48, 4.42) | 0.98 (0.44, 2.19) | 0.56      |
| Fiberglass                | 1.30 (0.87, 1.94)        | 1.26 (0.95, 1.66)        | 0.78      | NE                | 0.84 (0.52, 1.35)        | NE        | 3.60 (0.51, 25.3) | 0.48 (0.20, 1.16) | 0.07      |
| Mineral fibers            | 1.37 (0.58, 3.24)        | 1.58 (0.89, 2.80)        | 0.85      | 1.61 (0.55, 4.72) | 0.79 (0.42, 1.51)        | 0.72      | 0.26 (0.06, 1.06) | 0.50 (0.13, 1.93) | 0.60      |
| Refractory ceramic fibers | 1.18 (0.89, 1.58)        | <b>1.44 (1.20, 1.73)</b> | 0.28      | 0.89 (0.41, 1.96) | 1.01 (0.74, 1.39)        | 0.80      | 0.70 (0.24, 2.04) | 0.65 (0.31, 1.39) | 0.99      |

Data shown as prevalence ratio (PR) and 95% confidence interval (95%CI) obtained from modified Poisson regression models. Each row is a single exposure model. All models adjusted for sex, age and education (3 categories: up to high school, trade school and college or beyond). #p: p value for interaction; NS: nonsmoker; S: current/former smoker. NE: could not be estimated due to very small number.

**Supplementary Table S7:** Effect modification by exposure to smoke at childhood on the association between different occupational exposures at work and respiratory conditions in insulators.

| Exposures                 | Exposure to smoke at childhood |                          |      | Exposure to smoke at childhood |                          |      | Exposure to smoke at childhood |                          |      |
|---------------------------|--------------------------------|--------------------------|------|--------------------------------|--------------------------|------|--------------------------------|--------------------------|------|
|                           | No (N=329)                     | Yes (N=661)              |      | No (N=329)                     | Yes (N=661)              |      | No (N=329)                     | Yes (N=661)              |      |
|                           | Chest infection                |                          |      | COPD                           |                          |      | Asthma                         |                          |      |
|                           | PR (95%CI)                     | PR (95%CI)               | #p   | PR (95%CI)                     | PR (95%CI)               | #p   | PR (95%CI)                     | PR (95%CI)               | #p   |
| Asbestos                  | <b>1.52 (1.17, 1.98)</b>       | 1.20 (0.99, 1.44)        | 0.33 | 2.28 (1.01, 5.11)              | 1.27 (0.86, 1.86)        | 0.26 | 1.52 (0.57, 4.08)              | 1.12 (0.42, 2.99)        | 0.61 |
| Aerogels                  | 1.20 (0.95, 1.53)              | 1.08 (0.92, 1.27)        | 0.47 | 1.13 (0.58, 2.21)              | 0.99 (0.73, 1.36)        | 0.72 | 0.92 (0.35, 2.44)              | 1.26 (0.53, 2.97)        | 0.52 |
| Calcium silicate          | 1.19 (0.75, 1.88)              | <b>1.53 (1.10, 2.14)</b> | 0.30 | 0.67 (0.26, 1.71)              | <b>0.57 (0.39, 0.82)</b> | 0.63 | NE                             | 1.47 (0.35, 6.24)        | NE   |
| Carbon fibers             | 1.19 (0.92, 1.54)              | 1.17 (0.98, 1.39)        | 0.96 | 0.95 (0.50, 1.81)              | 1.20 (0.87, 1.65)        | 0.67 | 1.51 (0.54, 4.21)              | 0.94 (0.41, 2.15)        | 0.44 |
| Fiberglass                | 1.14 (0.79, 1.64)              | <b>1.36 (1.00, 1.84)</b> | 0.38 | 0.59 (0.24, 1.44)              | 0.91 (0.51, 1.63)        | 0.55 | 1.60 (0.36, 7.15)              | 0.68 (0.25, 1.80)        | 0.34 |
| Mineral fibers            | 2.68 (0.74, 9.75)              | 1.25 (0.75, 2.11)        | 0.29 | 0.53 (0.15, 1.89)              | 0.88 (0.44, 1.75)        | 0.45 | 0.59 (0.08, 4.26)              | <b>0.27 (0.09, 0.87)</b> | 0.53 |
| Refractory ceramic fibers | <b>1.56 (1.19, 2.06)</b>       | <b>1.24 (1.03, 1.50)</b> | 0.22 | 1.45 (0.71, 2.94)              | 0.84 (0.61, 1.15)        | 0.19 | 1.06 (0.43, 2.65)              | 0.50 (0.22, 1.14)        | 0.21 |

Data shown as prevalence ratio (PR) and 95% confidence interval (95%CI) obtained from modified Poisson regression models. Each row is a single exposure model. All models adjusted for sex, age, education (3 categories: up to high school, trade school and college or beyond) and smoking pack-years. #p: p value for interaction. NE: could not be estimated due to very small number.



**Supplementary Table S8:** Effect modification by parental lung disease on the association between different occupational exposures at work and respiratory conditions in insulators.

| Exposures                 | Parental lung disease    |                          |      | Parental lung disease    |                          |             | Parental lung disease |                   |      |
|---------------------------|--------------------------|--------------------------|------|--------------------------|--------------------------|-------------|-----------------------|-------------------|------|
|                           | No (N=740)               | Yes (N=250)              |      | No (N=740)               | Yes (N=250)              |             | No (N=740)            | Yes (N=250)       |      |
|                           | Chest infection          |                          |      | COPD                     |                          |             | Asthma                |                   |      |
|                           | PR (95%CI)               | PR (95%CI)               | #p   | PR (95%CI)               | PR (95%CI)               | #p          | PR (95%CI)            | PR (95%CI)        | #p   |
| Asbestos                  | <b>1.32 (1.10, 1.58)</b> | 1.24 (0.92, 1.68)        | 0.46 | <b>1.87 (1.16, 3.01)</b> | 0.85 (0.51, 1.41)        | <b>0.03</b> | 1.27 (0.53, 3.04)     | 1.62 (0.47, 5.63) | 0.97 |
| Aerogels                  | 1.10 (0.93, 1.28)        | 1.19 (0.93, 1.51)        | 0.46 | 0.94 (0.64, 1.37)        | 1.29 (0.85, 1.94)        | 0.14        | 1.03 (0.47, 2.28)     | 1.30 (0.49, 3.46) | 0.70 |
| Calcium silicate          | <b>1.42 (1.03, 1.95)</b> | 1.40 (0.85, 2.30)        | 0.98 | <b>0.56 (0.37, 0.87)</b> | <b>0.57 (0.34, 0.95)</b> | 0.92        | 3.38 (0.46, 25.0)     | 1.56 (0.21, 11.5) | 0.57 |
| Carbon fibers             | <b>1.21 (1.02, 1.44)</b> | 1.12 (0.86, 1.47)        | 0.57 | 1.14 (0.79, 1.64)        | 1.04 (0.65, 1.66)        | 0.75        | 0.84 (0.40, 1.80)     | 1.72 (0.54, 5.48) | 0.33 |
| Fiberglass                | 1.29 (0.98, 1.70)        | 1.21 (0.77, 1.90)        | 0.77 | 0.94 (0.49, 1.78)        | 0.66 (0.34, 1.30)        | 0.43        | 0.80 (0.30, 2.16)     | 1.23 (0.24, 6.23) | 0.75 |
| Mineral fibers            | 1.43 (0.80, 2.54)        | 1.72 (0.72, 4.08)        | 0.73 | 0.74 (0.33, 1.65)        | 0.89 (0.41, 1.92)        | 0.64        | 0.46 (0.12, 1.82)     | 0.32 (0.08, 1.28) | 0.89 |
| Refractory ceramic fibers | <b>1.29 (1.08, 1.55)</b> | <b>1.50 (1.08, 2.07)</b> | 0.49 | 1.01 (0.69, 1.48)        | 0.80 (0.50, 1.26)        | 0.41        | 0.56 (0.26, 1.21)     | 0.77 (0.28, 2.10) | 0.65 |

Data shown as prevalence ratio (PR) and 95% confidence interval (95%CI) obtained from modified Poisson regression models. Each row is a single exposure model.

All models adjusted for sex, age, education (3 categories: up to high school, trade school and college or beyond) and smoking pack-years. #p: p value for interaction.

**Supplementary Table S9:** Effect modification by family history of cancer on the association between different occupational exposures at work and respiratory conditions in insulators.

| Exposures                 | Family history of cancer |                          |      | Family history of cancer |                   |      | Family history of cancer |                   |      |
|---------------------------|--------------------------|--------------------------|------|--------------------------|-------------------|------|--------------------------|-------------------|------|
|                           | No (N=704)               | Yes (N=285)              |      | No (N=704)               | Yes (N=285)       |      | No (N=704)               | Yes (N=285)       |      |
|                           | Chest infection          |                          |      | COPD                     |                   |      | Asthma                   |                   |      |
|                           | PR (95%CI)               | PR (95%CI)               | #p   | PR (95%CI)               | PR (95%CI)        | #p   | PR (95%CI)               | PR (95%CI)        | #p   |
| Asbestos                  | <b>1.32 (1.10, 1.58)</b> | 1.21 (0.91, 1.60)        | 0.31 | 1.42 (0.92, 2.19)        | 1.48 (0.80, 2.72) | 0.69 | 1.77 (0.81, 3.88)        | 0.66 (0.17, 2.58) | 0.21 |
| Aerogels                  | <b>1.18 (1.00, 1.39)</b> | 0.95 (0.75, 1.20)        | 0.35 | 1.00 (0.69, 1.44)        | 1.06 (0.66, 1.69) | 0.58 | 0.94 (0.44, 1.98)        | 1.71 (0.56, 5.19) | 0.43 |
| Calcium silicate          | 1.25 (0.91, 1.71)        | <b>1.77 (1.03, 3.02)</b> | 0.24 | 0.64 (0.40, 1.02)        | 0.50 (0.30, 0.85) | 0.44 | 1.71 (0.41, 7.08)        | NE                | NE   |
| Carbon fibers             | 1.18 (0.99, 1.40)        | 1.11 (0.86, 1.44)        | 0.86 | 1.16 (0.81, 1.67)        | 1.05 (0.66, 1.72) | 0.55 | 1.08 (0.51, 2.28)        | 1.41 (0.40, 5.06) | 0.83 |
| Fiberglass                | 1.14 (0.89, 1.48)        | 1.69 (0.95, 3.00)        | 0.19 | 0.75 (0.43, 1.30)        | 1.02 (0.38, 2.72) | 0.80 | 0.98 (0.38, 2.53)        | 0.83 (0.17, 4.06) | 0.84 |
| Mineral fibers            | 1.49 (0.83, 2.68)        | 1.44 (0.60, 3.49)        | 0.92 | 0.89 (0.41, 1.97)        | 0.62 (0.23, 1.65) | 0.56 | 0.56 (0.14, 2.23)        | 0.23 (0.05, 1.08) | 0.43 |
| Refractory ceramic fibers | <b>1.30 (1.08, 1.57)</b> | <b>1.43 (1.06, 1.92)</b> | 0.58 | 0.98 (0.67, 1.43)        | 0.91 (0.56, 1.47) | 0.75 | 0.76 (0.37, 1.59)        | 0.53 (0.16, 1.74) | 0.53 |

Data shown as prevalence ratio (PR) and 95% confidence interval (95%CI) obtained from modified Poisson regression models. Each row is a single exposure model. All models adjusted for sex, age, education (3 categories: up to high school, trade school and college or beyond) and smoking pack-years. #p: p value for interaction. NE: could not be estimated due to very small number.

**Supplementary Table S10:** Effect modification by any allergies on the association between different occupational exposures at work and respiratory conditions.

| Exposures                 | Any allergies            |                          |      | Any allergies            |                          |             | Any allergies            |                   |      |
|---------------------------|--------------------------|--------------------------|------|--------------------------|--------------------------|-------------|--------------------------|-------------------|------|
|                           | No (N=574)               | Yes (N=416)              |      | No (N=605)               | Yes (N=438)              |             | No (N=605)               | Yes (N=438)       |      |
|                           | Chest infection          |                          |      | COPD                     |                          |             | Asthma                   |                   |      |
|                           | PR (95%CI)               | PR (95%CI)               | #p   | PR (95%CI)               | PR (95%CI)               | #p          | PR (95%CI)               | PR (95%CI)        | #p   |
| Asbestos                  | <b>1.36 (1.10, 1.68)</b> | 1.21 (0.97, 1.52)        | 0.19 | <b>1.75 (1.10, 2.79)</b> | 0.95 (0.54, 1.69)        | 0.14        | 2.10 (0.62, 7.10)        | 0.89 (0.35, 2.27) | 0.18 |
| Aerogels                  | <b>1.25 (1.04, 1.50)</b> | 0.97 (0.80, 1.19)        | 0.14 | 1.00 (0.69, 1.45)        | 1.11 (0.72, 1.70)        | 0.74        | 1.15 (0.42, 3.16)        | 1.12 (0.50, 2.49) | 0.88 |
| Calcium silicate          | 1.40 (0.98, 1.99)        | 1.47 (0.98, 2.20)        | 0.85 | 0.75 (0.46, 1.23)        | <b>0.40 (0.25, 0.63)</b> | 0.08        | NE                       | 1.36 (0.34, 5.44) | NE   |
| Carbon fibers             | 1.17 (0.96, 1.41)        | 1.23 (0.99, 1.53)        | 0.77 | 1.01 (0.70, 1.45)        | 1.13 (0.68, 1.88)        | 0.86        | 0.97 (0.36, 2.60)        | 1.28 (0.55, 2.94) | 0.62 |
| Fiberglass                | 1.23 (0.89, 1.69)        | 1.28 (0.92, 1.78)        | 0.99 | 1.93 (0.74, 5.03)        | <b>0.48 (0.27, 0.87)</b> | <b>0.01</b> | 1.57 (0.30, 8.28)        | 0.66 (0.26, 1.70) | 0.37 |
| Mineral fibers            | 1.06 (0.63, 1.78)        | <b>2.81 (1.02, 7.73)</b> | 0.10 | 0.76 (0.35, 1.63)        | 0.74 (0.28, 1.92)        | 1.00        | 0.40 (0.09, 1.80)        | 0.43 (0.12, 1.57) | 0.81 |
| Refractory ceramic fibers | <b>1.28 (1.04, 1.57)</b> | <b>1.39 (1.09, 1.77)</b> | 0.79 | 1.04 (0.70, 1.54)        | 0.85 (0.54, 1.36)        | 0.52        | <b>0.28 (0.10, 0.77)</b> | 1.09 (0.45, 2.59) | 0.05 |

Data shown as prevalence ratio (PR) and 95% confidence interval (95%CI) obtained from modified Poisson regression models. Each row is a single exposure model.

All models adjusted for sex, age, education (3 categories: up to high school, trade school and college or beyond) and smoking pack-years. #p: p value for interaction
